# Supplementary material for: Tackling Rapid Radiations With Targeted Sequencing
Source: Front Plant Sci. 2020 Jan 9;10:1655. doi: 10.3389/fpls.2019.01655 (PMC6962237; doi:10.3389/fpls.2019.01655)
Supplement: Supplementary file 14 [file Table_5.xlsx]

## Sheet: Table 5A
Supplementary Table 5A. Flagstat statistics generated for the loci targeted by the Angiosperms-353 probes for all accessions.
Sample ID	Species	Secondary	Supplementary	duplicates	Mapped (1.73% : N/A)	Paired in sequencing	Read1	Read2	Properly paired (1.45% : N/A)	With itself and mate mapped	Singletons (0.26% : N/A)	With mate mapped to a different chr	With mate mapped to a different chr (mapQ>=5)
LPM304	Cyperus afrorobustus*	0	6391	0	915188	9077556	4538778	4538778	832980	836178	72619	2380	1306
2334	Cyperus albescens	0	7241	0	205225	2139570	1069785	1069785	171078	172010	25974	830	589
LPM257	Cyperus articulatus	0	1043	0	629190	8141956	4070978	4070978	547864	550354	77793	1628	1193
LPM305	Cyperus breviglumis*	0	1169	0	179105	1485296	742648	742648	170786	171064	6872	268	131
LPM258	Cyperus cuspidatus	0	142	0	48955	533220	266610	266610	45482	45632	3181	112	74
2346	Cyperus erinaceus	0	8337	0	521626	7208670	3604335	3604335	317038	321188	192101	3892	2188
2319	Cyperus eriocauloides*	0	4366	0	155841	1352522	676261	676261	134044	135156	16319	1094	514
1074	Cyperus esculentus*	0	3478	0	586170	8167252	4083626	4083626	331240	333900	248792	2486	2040
2337	Cyperus hyalinus*	0	6032	0	889860	10010274	5005137	5005137	580372	585216	298612	4522	3572
3252	Cyperus hystricoides	0	1460	0	52423	394000	197000	197000	47884	48088	2875	180	93
LPM259	Cyperus karlschumannii 1	0	5960	0	455413	3150512	1575256	1575256	434678	436012	13441	1308	612
LPM260	Cyperus karlschumannii 2	0	641	0	75331	721644	360822	360822	72232	72416	2274	180	113
3155	Cyperus kyllingiella	0	3339	0	538575	6576778	3288389	3288389	343090	345878	189358	2694	2026
98	Cyperus laevigatus	0	4122	0	155892	1485512	742756	742756	132022	132810	18960	770	605
LPM261	Cyperus ledermannii 1	0	466	0	81515	766742	383371	383371	78502	78654	2395	148	66
LPM262	Cyperus ledermannii 2	0	740	0	87392	810078	405039	405039	83978	84146	2506	168	82
LPM242	Cyperus lipocarphioides	0	373	0	31233	253802	126901	126901	29396	29440	1420	34	16
LPM243	Cyperus malawicus	0	482	0	39685	274884	137442	137442	38120	38220	983	94	35
LPM263	Cyperus margaritaceus 1	0	1150	0	107111	871000	435500	435500	101498	101816	4145	300	151
LPM264	Cyperus margaritaceus 2	0	5340	0	463482	4465166	2232583	2232583	427432	429010	29132	1108	503
LPM265	Cyperus margaritaceus 3	0	2015	0	416589	6607580	3303790	3303790	384854	386028	28546	1084	771
LPM244	Cyperus microaureus	0	1070	0	178773	1130990	565495	565495	173294	174348	3355	1038	439
3161	Cyperus mindorensis 1*	0	3562	0	229856	1349228	674614	674614	211152	212006	14288	822	420
426	Cyperus mollipes	0	2280	0	56207	366112	183056	183056	48016	48386	5541	342	236
LPM267	Cyperus nduru 1	0	205	0	26344	246810	123405	123405	25412	25476	663	62	31
LPM268	Cyperus nduru 2	0	4256	0	761652	6315586	3157793	3157793	717424	719534	37862	2098	1476
1110	Cyperus niveus 1	0	2021	0	405562	7052694	3526347	3526347	226576	228328	175213	1610	1191
LPM271	Cyperus niveus 2	0	1173	0	174635	2125082	1062541	1062541	158510	158946	14516	368	223
LPM272	Cyperus niveus 3	0	642	0	76245	1232044	616022	616022	63028	63584	12019	294	169
LPM273	Cyperus niveus 4	0	1218	0	172966	2983888	1491944	1491944	156566	157174	14574	548	306
LPM269	Cyperus niveus var. tisserantii 1	0	632	0	160023	1938162	969081	969081	149366	149852	9539	464	231
LPM270	Cyperus niveus var. tisserantii 2	0	684	0	70059	748684	374342	374342	64270	64604	4771	278	156
3248	Cyperus papyrus*	0	1606	0	489973	9397420	4698710	4698710	294280	296480	191887	2142	1867
2338	Cyperus pedunculatus	0	3810	0	693475	8179200	4089600	4089600	447640	451180	238485	3148	2181
1072	Cyperus polystachyos	0	2502	0	523858	6951702	3475851	3475851	329958	332024	189332	1850	1430
LPM303	Cyperus richardii 1*	0	275	0	46598	401208	200604	200604	42386	42590	3733	140	79
LPM266	Cyperus sp.	0	4378	0	644906	8365840	4182920	4182920	583638	586682	53846	2994	2090
3156	Cyperus subparadoxus	0	10694	0	888097	7922162	3961081	3961081	648384	652344	225059	3590	2700
Cypascocapensis	Cyperus ascocapensis	0	115	0	14077	813654	406827	406827	11792	11822	2140	30	22
Cypbrevifolius	Cyperus brevifolius	0	92	0	16946	845720	422860	422860	14928	14960	1894	30	25
Cypesculentus	Cyperus esculentus bis	0	192	0	35248	1470910	735455	735455	31084	31224	3832	136	96
Cypmelanospermus	Cyperus melanospermus	0	71	0	19571	1008478	504239	504239	17274	17340	2160	66	47
Cypmindorensis	Cyperus mindorensis 2	0	88	0	20162	962788	481394	481394	17436	17496	2578	54	30
Cyprichardii	Cyperus richardii 2	0	199	0	41695	1748590	874295	874295	35922	36092	5404	170	134
Cyprotundus	Cyperus rotundus	0	45	0	7725	452970	226485	226485	6294	6320	1360	26	22
Cypruwenzoriensis	Cyperus ruwenzoriensis	0	56	0	5664	382646	191323	191323	4482	4518	1090	36	20

## Sheet: Table 5B
Supplementary Table 5B. Flagstat statistics generated for the loci targeted by the Cyperaceae-specific probes for all accessions.
Sample ID	Species	Secondary	Supplementary	duplicates	Mapped (1.73% : N/A)	Paired in sequencing	Read1	Read2	Properly paired (1.45% : N/A)	With itself and mate mapped	Singletons (0.26% : N/A)	With mate mapped to a different chr	With mate mapped to a different chr (mapQ>=5)
LPM304	Cyperus afrorobustus*	0	127	0	414871	9077556	4538778	4538778	399048	399530	15214	234	166
2334	Cyperus albescens	0	1410	0	79106	2139570	1069785	1069785	71376	71654	6042	276	223
LPM257	Cyperus articulatus	0	173	0	244723	8141956	4070978	4070978	222866	223532	21018	226	126
LPM305	Cyperus breviglumis*	0	6	0	83036	1485296	742648	742648	81854	81884	1146	28	23
LPM258	Cyperus cuspidatus	0	22	0	24397	533220	266610	266610	23164	23226	1149	32	22
2346	Cyperus erinaceus	0	87	0	205500	7208670	3604335	3604335	152790	152878	52535	54	54
2319	Cyperus eriocauloides*	0	7	0	54291	1352522	676261	676261	51314	51372	2912	32	28
1074	Cyperus esculentus*	0	124	0	245243	8167252	4083626	4083626	168612	168688	76431	50	38
2337	Cyperus hyalinus*	0	13	0	332731	10010274	5005137	5005137	255142	255234	77484	36	29
3252	Cyperus hystricoides	0	3	0	20493	394000	197000	197000	19950	19964	526	8	5
LPM259	Cyperus karlschumannii 1	0	16	0	181084	3150512	1575256	1575256	178384	178430	2638	30	22
LPM260	Cyperus karlschumannii 2	0	7	0	32403	721644	360822	360822	31936	31956	440	12	10
3155	Cyperus kyllingiella	0	359	0	206427	6576778	3288389	3288389	150852	150904	55164	38	26
98	Cyperus laevigatus	0	1004	0	63434	1485512	742756	742756	57326	57418	5012	92	49
LPM261	Cyperus ledermannii 1	0	2	0	36870	766742	383371	383371	36380	36390	478	6	5
LPM262	Cyperus ledermannii 2	0	10	0	39314	810078	405039	405039	38834	38854	450	10	7
LPM242	Cyperus lipocarphioides	0	1	0	15172	253802	126901	126901	14888	14892	279	4	3
LPM243	Cyperus malawicus	0	1	0	15559	274884	137442	137442	15384	15388	170	2	1
LPM263	Cyperus margaritaceus 1	0	5	0	45972	871000	435500	435500	45240	45256	711	10	5
LPM264	Cyperus margaritaceus 2	0	195	0	199554	4465166	2232583	2232583	192440	192736	6623	60	42
LPM265	Cyperus margaritaceus 3	0	39	0	167945	6607580	3303790	3303790	159684	159802	8104	56	41
LPM244	Cyperus microaureus	0	5	0	70045	1130990	565495	565495	69602	69630	410	24	15
3161	Cyperus mindorensis 1*	0	0	0	83160	1349228	674614	674614	80998	81036	2124	38	22
426	Cyperus mollipes	0	361	0	21215	366112	183056	183056	19778	19808	1046	26	21
LPM267	Cyperus nduru 1	0	0	0	11901	246810	123405	123405	11790	11792	109	2	1
LPM268	Cyperus nduru 2	0	39	0	295796	6315586	3157793	3157793	287000	287082	8675	40	34
1110	Cyperus niveus 1	0	45	0	152040	7052694	3526347	3526347	104302	104476	47519	46	39
LPM271	Cyperus niveus 2	0	17	0	74040	2125082	1062541	1062541	70466	70550	3473	40	28
LPM272	Cyperus niveus 3	0	30	0	39063	1232044	616022	616022	36046	36172	2861	22	14
LPM273	Cyperus niveus 4	0	11	0	78033	2983888	1491944	1491944	74018	74100	3922	46	33
LPM269	Cyperus niveus var. tisserantii 1	0	3	0	67492	1938162	969081	969081	65430	65476	2013	44	26
LPM270	Cyperus niveus var. tisserantii 2	0	2	0	29990	748684	374342	374342	29082	29112	876	18	11
3248	Cyperus papyrus*	0	108	0	230482	9397420	4698710	4698710	160212	160322	70052	32	31
2338	Cyperus pedunculatus	0	200	0	287295	8179200	4089600	4089600	213340	213452	73643	84	71
1072	Cyperus polystachyos	0	114	0	208112	6951702	3475851	3475851	152184	152278	55720	66	52
LPM303	Cyperus richardii 1*	0	1	0	18403	401208	200604	200604	17472	17514	888	34	30
LPM266	Cyperus sp.	0	56	0	257019	8365840	4182920	4182920	244404	244568	12395	50	35
3156	Cyperus subparadoxus	0	148	0	301701	7922162	3961081	3961081	248160	248826	52727	504	292
Cypascocapensis	Cyperus ascocapensis	0	5438	0	181610	813654	406827	406827	138796	139176	36996	292	257
Cypbrevifolius	Cyperus brevifolius	0	4831	0	187588	845720	422860	422860	145564	146216	36541	458	376
Cypesculentus	Cyperus esculentus bis	0	17104	0	506655	1470910	735455	735455	409164	409962	79589	596	490
Cypmelanospermus	Cyperus melanospermus	0	5410	0	207420	1008478	504239	504239	161424	162028	39982	438	320
Cypmindorensis	Cyperus mindorensis 2	0	4500	0	212286	962788	481394	481394	164744	165314	42472	374	281
Cyprichardii	Cyperus richardii 2	0	17531	0	532241	1748590	874295	874295	420228	421456	93254	884	668
Cyprotundus	Cyperus rotundus	0	4079	0	140432	452970	226485	226485	106792	107114	29239	196	135
Cypruwenzoriensis	Cyperus ruwenzoriensis	0	1607	0	72067	382646	191313	191323	52978	53156	17304	104	91

## Sheet: Table 5C
Supplementary Table 5C. Flagstat statistics generated for the 8 accessions enriched with the Angiosperms-353 probes (Dataset 3) compared with the 8 accessions enriched with the Cyperaceae-specific probes (Dataset 4).
Sample ID	Species	Secondary	Supplementary	duplicates	Mapped (1.73% : N/A)	Paired in sequencing	Read1	Read2	Properly paired (1.45% : N/A)	With itself and mate mapped	Singletons (0.26% : N/A)	With mate mapped to a different chr	With mate mapped to a different chr (mapQ>=5)
LPM304	Cyperus afrorobustus*	0	6391	0	915188	9077556	4538778	4538778	832980	836178	72619	2380	1306
LPM305	Cyperus breviglumis*	0	1169	0	179105	1485296	742648	742648	170786	171064	6872	268	131
2319	Cyperus eriocauloides*	0	4366	0	155841	1352522	676261	676261	134044	135156	16319	1094	514
1074	Cyperus esculentus*	0	3478	0	586170	8167252	4083626	4083626	331240	333900	248792	2486	2040
2337	Cyperus hyalinus*	0	6032	0	889860	10010274	5005137	5005137	580372	585216	298612	4522	3572
3161	Cyperus mindorensis 1*	0	3562	0	229856	1349228	674614	674614	211152	212006	14288	822	420
3248	Cyperus papyrus*	0	1606	0	489973	9397420	4698710	4698710	294280	296480	191887	2142	1867
LPM303	Cyperus richardii 1*	0	275	0	46598	401208	200604	200604	42386	42590	3733	140	79
Mean			3359.88		436574	5.15509e+06	2.57755e+06	2.57755e+06	324655	326574	106640	1731.75	1241.12
SD			2229.27		337995	4.32666e+06	2.16333e+06	2.16333e+06	261129	262447	121135	1456.69	1210.25
Min			275		46598	401208	200604	200604	42386	42590	3733	140	79
Max			6391		915188	10010274	5005137	5005137	832980	836178	298612	4522	3572
Total			26879		3492591	41240756	20620378	20620378	2597240	2612590	853122	13854	9929
Cypascocapensis	Cyperus ascocapensis	0	5438	0	181610	813654	406827	406827	138796	139176	36996	292	257
Cypbrevifolius	Cyperus brevifolius	0	4831	0	187588	845720	422860	422860	145564	146216	36541	458	376
Cypesculentus	Cyperus esculentus bis	0	17104	0	506655	1470910	735455	735455	409164	409962	79589	596	490
Cypmelanospermus	Cyperus melanospermus	0	5410	0	207420	1008478	504239	504239	161424	162028	39982	438	320
Cypmindorensis	Cyperus mindorensis 2	0	4500	0	212286	962788	481394	481394	164744	165314	42472	374	281
Cyprichardii	Cyperus richardii 2	0	17531	0	532241	1748590	874295	874295	420228	421456	93254	884	668
Cyprotundus	Cyperus rotundus	0	4079	0	140432	452970	226485	226485	106792	107114	29239	196	135
Cypruwenzoriensis	Cyperus ruwenzoriensis	0	1607	0	72067	382646	191313	191323	52978	53156	17304	104	91
Mean			7562.5		255037	960720	480358	480360	199961	200553	46922.1	417.75	327.25
SD			6141.2		169369	464474	232239	232237	137318	137608	25851.1	243.935	187.035
Min			1607		72067	382646	191313	191323	52978	53156	17304	104	91
Max			17531		532241	1748590	874295	874295	420228	421456	93254	884	668
Total			60500		2040299	7685756	3842868	3842878	1599690	1604422	375377	3342	2618
